# Supplementary material for: Degalactotigonin, a Steroidal Glycoside from Solanum nigrum, Induces Apoptosis and Cell Cycle Arrest via Inhibiting the EGFR Signaling Pathways in Pancreatic Cancer Cells
Source: Biomed Res Int. 2018 Dec 16;2018:3120972. doi: 10.1155/2018/3120972 (PMC6311251; doi:10.1155/2018/3120972)
Supplement: Supplementary Materials — The spectroscopic data of the isolated compounds used to support the findings of this study are included within the supplementary information file. [file 3120972.f1.docx]

**Supplement Material for**

Degalactotigonin, a steroidal glycoside from Solanum nigrum, induces apoptosis and cell cycle arrest via inhibiting the EGFR signaling pathways in pancreatic cancer cells

Hoang Le Tuan Anha,†, Tran Phuong Thaob,†, Do Thi Thaoc, Duong Thu Trangd, Nguyen Hai Dangd,*, Pham Van Cuongd, Phan Van Kiemd, Chau Van Minhd, Jeong-Hyung Leeb,*

*aMientrung Institute for Scientific Research, Vietnam Academy of Science and Technology (VAST), 321 Huynh Thuc Khang, Hue city, Thua Thien Hue 531600, Vietnam*

*bDepartment of Biochemistry, College of Natural Sciences, Kangwon National University, Chuncheon, Gangwon-Do 200-701, Republic of Korea*

*cInstitute of Biotechnology, VAST, 18 Hoang Quoc Viet, Cau Giay, Hanoi, Vietnam*

*dAdvanced Center for Bio-organic Chemistry, Institute of Marine Biochemistry, VAST, 18 Hoang Quoc Viet, Cau Giay, Hanoi, Vietnam*

Physiochemical data of compounds isolated from *Solanum nigrum*:

**Compound 1: Desgalactotigonin**

- White amorphous powder;

- Molecular formular: C62H100O26;

- Molecular weight: 1261

1H-NMR (DMSO-*d6*, 500 MHz): δH 0.91 (1H, m, Ha-1), 1.67 (1H, m, Hb-1), 1.29 (1H, m, Ha-2), 1.57 (1H, m, Hb-2), 3.14 (1H, m, H-3), 1.17 (1H, m, Ha-4), 1.65 (1H, m, Hb-4), 1.01 (1H, m, H-5), 1.23 (1H, m, Ha-6), 1.59 (1H, m, Hb-6), 0.88 (1H, m, Ha-7), 1.89 (1H, m, Hb-7), 1.49 (1H, m, H-8), 0.63 (1H, br t, *J* = 9.0 Hz, H-9), 1.20 (1H, m, Ha-11), 1.45 (1H, m, Hb-11), 1.10 (1H, m, Ha-12), 1.55 (1H, m, Hb-12), 1.04 (1H, m, H-14), 1.10 (1H, m, Ha-15), 1.89 (1H, m, Hb-15), 4.26 (1H, dd, *J* = 7.5, 14.5 Hz, H-16), 1.65 (1H, m, H-17), 0.71 (3H, s, CH3-18), 0.77 (3H, s, CH3-19), 1.80 (1H, t, *J* = 7.0 Hz, H-20), 0.89 (1H, d, *J* = 7.0 Hz, CH3-21), 1.49 (1H, m, Ha-23), 1.61 (1H, m, Hb-23), 1.39 (1H, m, Ha-24), 1.72 (1H, m, Hb-24), 1.51 (1H, m, H-25), 3.40 (1H, overlapped, Ha-26), 3.23 (1H, dd, *J* = 5.0, 10.5 Hz, Hb-26), 0.73 (3H, d, *J* = 6.5 Hz, CH3-27), 4.20 (1H, d, *J* = 7.5 Hz, H-1′), 3.05 (1H, overlapped, H-2′), 3.22(1H, overlapped, H-3′), 3.77(1H, overlapped, H-4′), 3.52 (1H, overlapped, H-5′), 3.39 (1H, overlapped, Ha-6′), 3.74 (1H, overlapped, Hb-6′), 4.41 (1H, d, *J* = 7.5 Hz, H-1″), 3.58 (1H, overlapped, H-2″), 3.60 (1H, overlapped, H-3″), 3.14 (1H, overlapped, H-4″), 3.15 (1H, overlapped, H-5″), 3.38 (1H, overlapped, Ha-6″), 3.75 (1H, overlapped, Hb-6″), 4.32 (1H, d, *J* = 8.0 Hz, H-1″′), 2.96 (1H, overlapped, H-2″′), 3.15 (1H, overlapped, H-3″′), 3.32 (1H, overlapped, H-4″′), 3.53 (1H, overlapped, H-5″′), 3.90 (1H, dd, *J* = 2.5, 11.5 Hz, Ha-6″′), 3.59 (1H, dd, *J* = 5.5, 11.5 Hz, Hb-6″′), 4.49 (1H, d, *J* = 8.0 Hz, H-1″″), 3.51 (1H, overlapped, H-2″″), 3.14 (1H, overlapped, H-3″″), 3.30 (1H, overlapped, H-4″″), 3.11 (1H, dd, *J* = 4.5, 11.0 Hz, Ha-5″″) and 3.77 (1H, dd, *J* = 2.0, 11.0 Hz, Hb-5″″).

13C-NMR (DMSO-*d6*, 125MHz): δC 36.5 (C-1), 28.5 (C-2), 76.4 (C-3), 34.0 (C-4), 44.0 (C-5), 28.3 (C-6), 31.8 (C-7), 34.6 (C-8), 53.7 (C-9), 35.3(C-10), 20.6 (C-11), 38.9 (C-12), 40.0 (C-13), 55.6 (C-14), 31.4 (C-15), 80.2 (C-16), 61.9 (C-17), 16.2 (C-18), 12.1 (C-19), 41.1 (C-20), 14.6 (C-21), 108.4 (C-22), 30.9 (C-23), 29.0 (C-24), 29.8 (C-25), 65.9 (C-6), 17.1 (C-7), 100.9 (C-1′), 73.5 (C-2′), 75.9 (C-3′), 78.9 (C-4′), 76.1(C-5′), 59.5 (C-6′), 103.3 (C-1″), 79.3 (C-2″), 85.0 (C-3″), 69.7 (C-4″), 76.5 (C-5″), 61.3 (C-6″), 102.4 (C-1″′), 74.3 (C-2″′), 76.9 (C-3″′), 69.4 (C-4″′), 76.5 (C-5″′), 60.9 (C-6″′), 103.3 (C-1″″), 73.8 (C-2″″), 76.1 (C-3″″), 68.8 (C-4″″) and 65.9 (C-5″″).

**Compound 2: Solasodine**

- white amorphous powder

- molecular formula: C27H43NO2

- molecular weight: 413

1H-NMR (pyridine-*d5*, 500 MHz): δH 0.88 (1H, m, Ha-1), 1.59 (1H, m, Hb-1), 2.02 (2H, m, H-2), 3.71 (1H, m, H-3), 2.51 (2H, m, H-4), 5.23 (1H, br s, H-6), 1.65 (1H, m, Ha-7), 1.99 (1H, m, Hb-7), 1.36 (1H, m, H-8), 0.76 (1H, m, H-9), 1.21 (2H, m, H-11), 0.98 (1H, m, Ha-12), 1.54 (1H, m, Hb-12), 0.94 (1H, m, H-14), 1.30 (1H, m, Ha-15), 1.64 (1H, m, Hb-15), 4.46 (1H, br d, *J* = 6.0, H-16), 1.80 (1H, br d, *J* = 7.0 Hz, H-17), 0.76 (3H, s, CH3-18), 0.88 (3H, s, CH3-19), 1.90 (1H, t, *J* = 5.5 Hz, H-20), 1.12 (1H, d, *J* = 5.5 Hz, CH3-21), 1.63 (1H, m, Ha-23), 1.78 (1H, m, Hb-23), 1.54 (2H, m, H-24), 1.69 (1H, m, H-25), 2.68 (1H, t, *J* = 5.5 Hz, Ha-26), 2.66 (1H, br d, *J* = 5.5 Hz, Hb-26) and 0.70 (3H, d, *J* = 6.0 Hz, CH3-27).

13C-NMR (pyridine-*d5*, 125 MHz): δC 37.0 (C-1), 31.1 (C-2), 70.8 (C-3), 41.8 (C-4), 141.1 (C-5), 120.7 (C-6), 31.6 (C-7), 31.0 (C-8), 49.7 (C-9), 36.3 (C-10), 20.5 (C-11), 39.3 (C-12), 40.0 (C-13), 56.9 (C-14), 31.7 (C-15), 78.8 (C-16), 62.2 (C-17), 15.9 (C-18), 18.9 (C-19), 41.3 (C-20), 15.0 (C-21), 98.3 (C-22), 33.5 (C-23), 30.0 (C-24), 30.1 (C-25), 46.8 (C-66) and 19.1 (C-27).

**Compound 3: O-acetylsolasodine**

- white amorphous powder

- molecular formula: C29H45NO3

- weight formula: 455

1H-NMR (CDCl3, 500 MHz): δH 1.16 (1H, m, Ha-1), 1.85 (1H, m, Hb-1), 1.57 (1H, m, Ha-2), 1.87 (1H, m, Hb-2), 4.59 (1H, m, H-3), 2.33 (1H, br d, *J* = 5.0 Hz, H-4), 5.37 (1H, br d, *J* = 5.0Hz, H-6), 2.14 (2H, m, H-7), 1.68 (1H, m, H-8), 0.72 (1H, m, H-9), 1.53 (2H, m, H-11), 1.19 (1H, dt, *J* = 3.5, 12.5 Hz, Ha-12), 1.68 (1H, dd, *J* = 5.0, 12.5 Hz, Hb-12), 1.71 (1H, t, *J* = 8.0 Hz, H-14), 2.20 (1H, m, H-15), 4.28 (1H, q, *J* = 7.0, 15.0 Hz, H-16), 1.70 (1H, overlapped, H-17), 0.82 (3H, s, CH3-18), 1.04 (3H, s, CH3-19), 1.90 (1H, dd, *J* = 7.0, 14.0 Hz, H-20), 0.94 (1H, d, *J* = 7.0 Hz, CH3-21), 1.59 (1H, m, Ha-23), 1.63 (1H, m, Hb-23), 1.38 (1H, m, Ha-24), 1.60 (1H, m, Hb-24), 1.54 (1H, m, H-25), 2.60 (1H, t, J = 11.0 Hz, Ha-26), 2.66 (1H, dd, J = 3.5, 11.0), 0.84 (3H, d, *J* = 7.5 Hz, CH3-27) and 2.03 (3H, s, H-2′).

13C-NMR (CDCl3, 125 MHz): δC 37.0 (C-1), 27.7 (C-2), 73.9 (C-3), 38.1 (C-4), 139.7 (C-5), 122.3 (C-6), 32.1 (C-7), 31.4 (C-8), 50.0 (C-9), 36.7 (C-10), 20.8 (C-11), 39.9 (C-12), 40.5 (C-13), 56.4 (C-14), 32.2 (C-15), 78.7 (C-16), 62.8 (C-17), 16.4 (C-18), 19.3 (C-19), 41.2 (C-20), 15.3 (C-21), 98.3 (C-22), 34.1 (C-23), 30.3 (C-24), 31.4 (C-25), 47.7 (C-66), 19.3 (C-27), 170.6 (C-1′) and 21.4 (C-2′).

**Compoud 4: Soladucoside A**

- white amorphous powder

- molecular formula: C39H62O15

- molecular weight: 770

1H-NMR (MeOD, 500 MHz): δH 1.00 (1H, m, Ha-1), 1.74 (1H, m, Hb-1), 1.33 (1H, m, Ha-2), 1.90 (1H, m, Hb-2), 3.60 (1H, m, H-3), 1.37 (1H, m, Ha-4), 1.72 (1H, m, Hb-4), 1.11 (1H, t, *J* = 7.5 Hz, H-5), 1.30 (1H, m, Ha-6), 1.87 (1H, m, Hb-6), 1.08 (1H, m, Ha-7), 2.13 (1H, dd, *J* = 4.0, 13.5 Hz, Hb-7), 1.78 (1H, dd, *J* = 3.5, 11.0 Hz, H-8), 0.72 (1H, dt, *J* = 4.0, 12.0 Hz, H-9), 1.35 (1H, m, Ha-11), 1.56 (1H, m, Hb-11), 1.21 (1H, m, Ha-12), 1.68 (1H, m, Hb-12), 1.21 (1H, m, H-14), 3.80 (1H, dd, *J* = 4.0, 11.0 Hz, H-15), 4.35 (1H, dd, *J* = 4.5, 9.5 Hz, H-16), 1.93 (1H, m, H-17), 0.83 (3H, s, CH3-18), 0.88 (3H, s, CH3-19), 2.47 (1H, t, *J* = 7.0 Hz, H-20), 1.03 (1H, d, *J* = 7.0 Hz, CH3-21), 4.40 (1H, dd, *J* = 2.0, 8.5 Hz, H-23), 1.94 (1H, dd, *J* = 9.0, 13.0 Hz, Ha-24), 2.74 (1H, ddd, *J* = 2.0, 9.0, 12.5 Hz, Hb-24), 2.91 (1H, m, H-25), 1.22 (3H, d, *J* = 7.5 Hz, CH3-27), 4.46 (1H, d, *J* = 7.5 Hz, H-1′), 3.63 (1H, t, *J* = 8.0 Hz, H-2′), 3.50 (1H, t, *J* = 6.0 Hz, H-3′), 3.81 (1H, overlapped, H-4′), 3.74 (1H, overlapped, H-5′), 3.73 (2H, overlapped, H-6′), 5.17 (1H, d, *J* = 1.5 Hz, H-1″), 3.93 (1H, dd, *J* = 2.0, 9.0 Hz, H-2″), 3.68 (1H, *J* = 3.5, 9.0 Hz,, H-3″), 3.41 (1H, t, *J* = 9.0 Hz, H-4″), 4.14 (1H, *J* = 6.0, 9.0 Hz,, H-5″) and 1.26 (3H, d, *J* = 7.5, Hb-6″).

13C-NMR (MeOD, 125 MHz): δC 38.4 (C-1), 30.0 (C-2), 76.2 (C-3), 35.1 (C-4), 46.0 (C-5), 29.8 (C-6), 33.3 (C-7), 37.0 (C-8), 55.8 (C-9), 36.8 (C-10), 22.0 (C-11), 41.8 (C-12), 42.3 (C-13), 61.3 (C-14), 80.0 (C-15), 92.0 (C-16), 60.6 (C-17), 18.1 (C-18), 12.9 (C-19), 37.9 (C-20), 15.2 (C-21), 110.4 (C-22), 78.8 (C-23), 31.5 (C-24), 35.1 (C-25), 183.3 (C-66), 16.3 (C-27), 100.7 (C-1′), 77.2 (C-2′), 76.3 (C-3′), 70.9 (C-4′), 78.5 (C-5′), 62.4 (C-6′), 102.2 (C-1″), 72.2 (C-2″), 72.4 (C-3″), 73.9 (C-4″), 69.7 (C-5″) and 18.0 (C-6″).
